# Supplementary material for: Patient Health Record Systems Scope and Functionalities: Literature Review and Future Directions
Source: PubMed Central journal article supplement (PMC5707430; doi:10.2196/jmir.8073), 2017-11-15
Supplement: jmir_v19i11e388_app1.pdf [file jmir_v19i11e388_app1.pdf]

|                             | Data Elements*                                                                                                                                                                                                                                                                                                                                                 | References                                                                        |
|-----------------------------|----------------------------------------------------------------------------------------------------------------------------------------------------------------------------------------------------------------------------------------------------------------------------------------------------------------------------------------------------------------|-----------------------------------------------------------------------------------|
| Patient General Information | <b>Personal Information</b><br>Name, photo, date of birth, age, gender, current location, contact information, occupation, number of family members, economic history                                                                                                                                                                                          | [17–33]                                                                           |
|                             | <b>Psychographics</b><br>Leisure, travel history, living conditions, psychosocial information (e.g. social contact, interpersonal relations, caregiving, neglect, abuse), social information history, patient empowerment; patient satisfaction, socializing, Observations of Daily Living, mood, alcohol use, tobacco use, sexual behavior, Tobacco cessation | [18,21,23,27,29–31,34–43]                                                         |
|                             | <b>Genetic Data</b>                                                                                                                                                                                                                                                                                                                                            | [18]                                                                              |
|                             | <b>Preferences</b><br>Hospital preferences, pharmacy preferences, emergency contact information, caregiver information, advance directive, living will, power of attorney                                                                                                                                                                                      | [3,22,27,29,31,37,44–48]                                                          |
|                             | <b>PHR Settings</b><br>Reminder preferences; activation, profile; security and privacy settings registration and authentication (log-in) information; secure message opt-in; protection settings                                                                                                                                                               | [22,25,29,31,34,38,46,49–53]                                                      |
| Scheduling                  | <b>Appointments</b><br>schedule date and time, appointment reminders                                                                                                                                                                                                                                                                                           | [19,21,25,26,29,30,42,46,47, 54–63]                                               |
|                             | <b>Facility Information</b><br>Facility contact information                                                                                                                                                                                                                                                                                                    | [29]                                                                              |
|                             | <b>Personalized Search Results</b><br>Healthcare providers, health-related services                                                                                                                                                                                                                                                                            | [20,22,47,49,64]                                                                  |
|                             | <b>Provider Information</b><br>Example: provider (pediatrician, dental) name, photograph, number, address                                                                                                                                                                                                                                                      | [3,19,20,22,24,27,31,32,37,4 8,63,65]                                             |
| Visits                      | <b>Outpatient Visit Information</b><br>Visit summary (clinical summary), provider progress notes                                                                                                                                                                                                                                                               | [18,21– 23,26,28,32,43,46,47,58,63,6 3,66–69]                                     |
|                             | <b>Visit Preparation Information</b><br>Items to discuss during the visit (examples: care plan using patient chart data, patient goals, referrals, self-care, and patients’ responses to pre-visit questionnaires)                                                                                                                                             | [24,46,66,70–72]                                                                  |
| Diagnostics                 | <b>Vital Signs &amp; Anthropometric Data</b><br>Examples: blood pressure (BP), blood glucose, body weight, body mass index, pediatric measures (head circumference and developmental milestones, growth chart)                                                                                                                                                 | [22,23,25,29,30,32,37,39,40, 46,47,55,59–62,68–70,73– 76]                         |
|                             | <b>Physiological Information</b><br>Electrocardiograms, device readings (infra-red and biosensors, video cameras)                                                                                                                                                                                                                                              | [36,37,76–78]                                                                     |
|                             | <b>Results</b><br>Lab (chemistry and hematology), imaging, microbiology, pathology, and screenings                                                                                                                                                                                                                                                             | [3,18,19,21– 23,25,26,28,30,31,37,39,42,4 6,47,50,56,59–63,66,68– 70,73,75,79–89] |
| History of present illness  | <b>Allergies</b><br>Examples: allergy record by date, allergic reaction, allergy diagnosis                                                                                                                                                                                                                                                                     | [2,3,17,21– 24,26,27,29,31,33,38,44,48,6 3,67,69,83,90]                           |
|                             | <b>Diagnosis</b>                                                                                                                                                                                                                                                                                                                                               | [19,21,38,42,47,48,50,91,92]                                                      |
|                             | <b>Health State</b><br>Health conditions trends, health status, physical condition, mental health condition, medical health record, medical records review, oral health, eye records                                                                                                                                                                           | [2,3,18,21–23,28– 30,33,35,44,48– 50,53,57,58,63,70,77,93,94]                     |

|                                       |                                                                                                                                                                                                                       |                                                                                                       |
|---------------------------------------|-----------------------------------------------------------------------------------------------------------------------------------------------------------------------------------------------------------------------|-------------------------------------------------------------------------------------------------------|
|                                       | <b>Medical History</b><br>Medical history, family health history                                                                                                                                                      | [17,18,22,25,27–29,31,42,44,47,48,50,56,57,61,65,66,68,69,71,73,80,83,90,95–99]                       |
|                                       | <b>Surgical History</b><br>Emergency health record (care procedures), hospitalizations                                                                                                                                | [3,17,22,24,27,31,38,47,56,78]                                                                        |
|                                       | <b>Problem List</b><br>Pre-existing symptoms, new symptoms                                                                                                                                                            | [2,17,18,21–24,26–28,31,33,36,38,60,61,63,67,69,71,77,92]                                             |
| <b>Treatments</b>                     | <b>Compliance</b><br>Medication monitoring data (e.g. medication possession ratio), medication adherence outcomes, perceived barriers, medication reminders                                                           | [51,66,75,100–102]                                                                                    |
|                                       | <b>Medical Equipment/Supplies</b><br>Technology support needs (ventilator, monitor, surgical site care)                                                                                                               | [22]                                                                                                  |
|                                       | <b>Prescription Medications</b><br>Active list (dose, schedule), interaction record and checks, prescription photograph, history, refill request, prescription feedback, medication reconciliation                    | [3,18,20–27,29–31,33,34,36,38–40,42,44,46–52,54–57,60–63,66–69,71,75,80,82–84,88,90,91,93,95,102–109] |
|                                       | <b>Self-Treatment</b><br>Example: over-the-counter medications, herbals and other supplements                                                                                                                         | [3,17,29,44,55,82]                                                                                    |
|                                       | <b>Treatment Plan</b><br>Treatment plan description, treatment plan change, specialist referral                                                                                                                       | [3,17,21,27,36,42,43,46–48,56,60,71,90,92,110]                                                        |
| <b>Outcomes</b>                       | <b>Outcomes</b><br>Patient health outcomes, adverse reactions                                                                                                                                                         | [22,35,62]                                                                                            |
| <b>Patient Provider Communication</b> | <b>Patient-Provider Message</b><br>Secure messages (content: non-urgent health-related information, appointment requests, prescription renewal, health-related concerns)                                              | [21,25,29,30,35,39–41,52,54–56,61–63,67–70,73,80,88,91,93,95,111]                                     |
| <b>Educational Resources</b>          | <b>Incentive Programs Data</b><br>Certificates of accomplishments (for completing online educational quizzes)                                                                                                         | [43,56,66,73,74]                                                                                      |
|                                       | <b>Patient Health Education Material</b><br>Instructions and educational material regarding health conditions, immunizations, over-the-counter medications, contraindicated self-care activities. clinical trial data | [21,23,25,29,37–40,43,46,47,54,56,57,59,61,64,66,68,69,73,78,81,83,88,93,112,113]                     |
|                                       | <b>Trainings</b><br>Self-management trainings, patient coaching                                                                                                                                                       | [114]                                                                                                 |
|                                       | <b>Personalized Health Advice</b><br>Advice from health support groups (support from patients with similar health conditions), personalized advice/tips                                                               | [18,25,46,55,59,68,100]                                                                               |

|                                       |                                                                                                                                                                                                                            |                                                          |
|---------------------------------------|----------------------------------------------------------------------------------------------------------------------------------------------------------------------------------------------------------------------------|----------------------------------------------------------|
| <b>Patient Environment</b>            | <b>Environmental Information</b><br>Community health concerns; environmental domain (example: income, sanitation, residence, neighborhood-workspace safety)                                                                | [36,50,56,67]                                            |
| <b>Prevention Data</b>                | <b>Assessment Information</b><br>Screening exams, risk/health assessment questions and feedback, routine screening, screening/lab work reminders, potential risk factors, risk profile, personal disease risk              | [3,29,31,32,42,43,46,50,81,94,110,111,115]               |
|                                       | <b>Immunizations</b><br>Status, eligibility, due dates, availability, counter-indications, family immunization history, information about disease risk minimization, immunization reminders                                | [3,18,21,26,29,31–33,38,46–48,50,63,68,69,83,84,112,115] |
|                                       | <b>Personal Health Goals</b><br>Desired and planned values (blood sugar, cholesterol/BP), progress towards goals                                                                                                           | [19,24,38–40,43,72,74]                                   |
|                                       | <b>Prevention Adherence</b><br>Compliance with guideline-recommended services, alerts (e.g. high BP, weight loss)                                                                                                          | [69,76,77,100,111,113,116]                               |
|                                       | <b>Preventative Care</b><br>Supplements (e.g. herbal), self-care activities, daily aspirin, preventive care reminders, health maintenance reminders                                                                        | [18,30,55,57,64,72,79,83,91]                             |
| <b>Daily Living Patterns</b>          | <b>Home Monitoring Data</b><br>Nutrition, diet, meals, food intake, exercise, physical activity, estimated calories burnt, health diaries, health maintenance schedule and activities, symptom monitoring, health tracking | [3,17,18,23,31,36,43,62,65,72,100,117,118]               |
| <b>Healthcare Administrative Data</b> | <b>Health care cost management</b><br>Examples: admissions/discharges, health spending, billing data                                                                                                                       | [23,25,26,42,46,47,56,63]                                |
|                                       | <b>Insurance Data</b><br>Examples: insurance claims, benefits, copay, reimbursement                                                                                                                                        | [3,26,27,30,31,38,44,47,48,79,80,91]                     |

**Table 1: Patient data elements reported in the literature**

\*Data description includes a list of items retrieved from the articles reviewed and is not comprehensive
